# Supplementary material
Source: publisher site journal article supplement (https://www.dovepress.com/article/609750)
Supplement: Supplementary file 1 [file 609750%20Supplementary%20Tables%201-4.docx]

**Supplementary Materials**

Table S1 First-round Delphi expert questionnaire.

| Category | Section | Item | Suggested revisions |
| --- | --- | --- | --- |
| Preoperative assessment and optimization | Nutritional screening and assessment | 1. Nutritional risk screening completed using NRS 2002 within 24 h of admission. |  |
|  |  | 2. Patients at risk of malnutrition should undergo a comprehensive assessment using PG-SGA/GLIM within 48 h. |  |
|  |  | 3. Patients without a nutritional risk should be re-screened every 7 days and immediately after the surgery. |  |
|  |  | 4. Using CONUT and PNI to monitor serum albumin and lymphocyte count weekly. |  |
|  | Nutritional intervention | 5. Surgery should be postponed for 7-14 days for preoperative nutritional therapy in patients at a high risk for malnutrition (weight loss >10%-15%, BMI <18.5, PG-SGA C, NRS 2002 score > 5, serum albumin < 30g/L). |  |
|  |  | 6. ONS or EN is the preferred intervention, with a target energy intake of 20-30 kcal/kg/day and protein intake of 1.2-1.5 g/kg/day. Immunonutrients may be provided. |  |
|  |  | 7. Fast from solids for 6 h and from liquids for 2 h before surgery. Patients without a history of diabetes should drink 400 mL of a beverage containing 12.5% ​​carbohydrates 2 h before surgery |  |
|  | Risk stratification intervention | 8. Stratify POD risk (high/intermediate/low risk) based on age, cancer type, MMSE, comorbidities, and medication history. |  |
|  |  | 9. Targeted intensive intervention plans for high-risk patients (cognitive training and optimize nutritional supports). |  |
|  |  | 10. Correct delirium triggers such as anemia, folic acid/vitamin B1/B12 deficiency, and electrolyte imbalance. |  |
| Intraoperative management | Anesthesia optimization | 11. Avoid using benzodiazepines, anticholinergics, and high-dose opioids during surgery. |  |
|  |  | 12. Monitor anesthesia depth using BIS or EEG to avoid excessive deep anesthesia. |  |
|  |  | 13. Maintain hemodynamic stability and avoid hypotension and hypoxemia. |  |
| Postoperative intervention | Nutritional support | 14. Resume oral feeding early. If intake is less than 50% of the required intake, start EN early. |  |
|  |  | 15. For patients whose EN intake is less than 50% of the target amount for more than 7 days, combined with PN support, with central venous access and an integrated three-lumen bag as the preferred route. |  |
|  | Early Activity and Cognitive Intervention | 16. Start personalized exercise on postoperative day 1 (turning over → sitting up → standing → walking). |  |
|  |  | 17. Orientation training three times a day, and familiarity training to restore cognitive abilities related to people and things. |  |
|  |  | 18. Differentiated interventions for different subtypes of delirium (hyperactive/depression). |  |
|  | Non-drug and drug management | 19. Optimize ward environment (noise control, suitable temperature and humidity, sufficient natural light) to maintain a regular sleep-wake cycle. |  |
|  |  | 20. Employ multimodal analgesia to reduce opioid dosage. |  |
|  |  | 21. Non-pharmacological intervention is the first choice. For severe agitation, a short-term low-dose haloperidol can be used. |  |
| Monitoring and Team Collaboration | Delirium screening | 22. Postoperative daily screening using the CAM/CAM-ICU/4A test/NU-DESC scales, with high-risk patients assessed every 8 h. |  |
|  | Multidisciplinary collaboration | 23. Establish a multidisciplinary team including physicians, nurses, nutritionists, anesthesiologists, and rehabilitation therapists. |  |
|  |  | 24. Hold multidisciplinary meetings regularly to dynamically adjust individualized treatment plans. |  |
|  | Health education and family collaboration | 25. Inform the patient and their family of the risks and preventative measures of POD before the procedure. |  |

BIS, Bispectral index; BMI, body mass index; CAM, confusion assessment method; CONUT, controlling nutritional status; EEG, electroencephalogram; EN, enteral nutrition; GLIM, global leadership initiative on malnutrition; ICU, intensive care unit; M±SD, mean ± standard deviation; NRS 2002, nutrition risk screening 2002; NU-DESC, nursing delirium screening scale; ONS, oral nutrition supplements; PG-SGA, patient-generated subjective global assessment; POD, postoperative delirium; PN, parenteral nutrition; PNI, prognostic nutritional index.

Table S2 Second-round Delphi expert questionnaire.

| Category | Section | Item | Source Explanation (Added/deleted/revised) |
| --- | --- | --- | --- |
| Preoperative assessment and optimization | Nutritional screening and assessment | 1. Nutritional risk screening completed using NRS 2002 within 24 h of admission. Those at risk of malnutrition should undergo a comprehensive assessment using PG-SGA/GLIM within 48 h. | Merge and revise the previous item 1 and 2 |
|  |  | 2. Patients without a nutritional risk should be re-screened every 7 days and immediately after the surgery. | Previous item 3 |
|  |  | 3. Using CONUT and PNI to monitor serum albumin and lymphocyte count weekly. | Previous item 4 |
|  | Nutritional intervention | 4. Surgery should be postponed for 7-14 days for preoperative nutritional therapy in patients with any of the following conditions: weight loss >10%-15% within 6 months, BMI <18.5, PG-SGA C, NRS 2002 score > 5, serum albumin < 30g/L in the absence of renal dysfunction. | Previous item 5 |
|  |  | 5. ONS or EN is the preferred intervention, with a target energy intake of 20-30 kcal/kg/day and protein intake of 1.2-1.5 g/kg/day. Immunonutrients may be provided. | Previous item 6 |
|  |  | 6. Patients with poor gastrointestinal motility should fast from solids for 6 h and from liquids for 2 h before surgery. Patients without a history of diabetes should drink 400 mL of a beverage containing 12.5% ​​carbohydrates 2 h before surgery (flexible in individual patients). | Previous item 7, with minor modification |
|  | Risk stratification intervention | 7. Stratify POD risk (high/intermediate/low risk) based on age, cancer type, MMSE, comorbidities, and medication history. | Previous item 8 |
|  |  | 8. Targeted intensive intervention plans for high-risk patients (cognitive training and optimize nutritional supports). | Previous item 9 |
|  |  | 9. Correct delirium triggers such as anemia, folic acid/vitamin B1/B12 deficiency, and electrolyte imbalance. | Previous item 10 |
| Intraoperative management | Anesthesia optimization | 10. Avoid using benzodiazepines, anticholinergics, and high-dose opioids during surgery. | Previous item 11 |
|  |  | 11. Monitor anesthesia depth using BIS or EEG to avoid excessive deep anesthesia. | Previous item 12 |
|  |  | 12. Maintain hemodynamic stability and avoid hypotension and hypoxemia. | Previous item 13 |
| Postoperative intervention | Nutritional support | 13. Resume oral feeding early. If intake is less than 50% of the required intake, start EN early. | Previous item 14 |
|  |  | 14. For patients whose EN intake is less than 50% of the target amount for more than 7 days, combined with PN support, with central venous access and an integrated three-lumen bag as the preferred route. | Previous item 15 |
|  |  | 15. Dynamically monitor nutritional tolerance, such as gastrointestinal reactions, metabolic indicators, and adjust treatment plan accordingly. | Newly added |
|  | Early Activity and Cognitive Intervention | 16. Start personalized exercise on postoperative day 1 (turning over → sitting up → standing → walking). | Previous item 16 |
|  |  | 17. "3-question" cognitive training sessions three times a day, combined with orientation recovery training for familiar people and things. | Previous item 17, clarification on training methods |
|  |  | 18. Strengthen environmental interventions in hyperactive delirium; increase sensory stimulation in hypoactive delirium. | Previous item 18, clarification on intervention methods |
|  | Non-drug and drug management | 19. Optimize ward environment (noise control, suitable temperature and humidity, sufficient natural light) to maintain a regular sleep-wake cycle. | Previous item 19 |
|  |  | 20. Employ multimodal analgesia to reduce opioid dosage. | Previous item 20 |
|  |  | 21. Non-pharmacological intervention is the first choice. For severe agitation, a short-term low-dose haloperidol (0.5-1 mg) can be used. | Previous item 21, clarification on intervention methods |
| Monitoring and Team Collaboration | Delirium screening | 22. Postoperative daily screening using the CAM/CAM-ICU/4A test/NU-DESC scales, with high-risk patients assessed every 8 h. | Previous item 22 |
|  | Multidisciplinary collaboration | 23. Establish a multidisciplinary team including physicians, nurses, nutritionists, anesthesiologists, and rehabilitation therapists. | Previous item 23 |
|  |  | 24. Hold multidisciplinary meetings regularly to dynamically adjust individualized treatment plans. | Previous item 24 |
|  |  | 25. Establish an electronic system reminder mechanism to ensure timely verification of key intervention measures (nutritional screening, assessment, and intervention). | Newly added |
|  | Health education and family collaboration | 26. Inform the patient and their family of the risks and preventative measures of POD before the procedure. | Derived from previous item 25 |
|  |  | 27. Provide caregiving skills training for family members (communication skills, environmental maintenance, cognitive support). | Derived from previous item 25 |

BIS, Bispectral index; BMI, body mass index; CAM, confusion assessment method; CONUT, controlling nutritional status; EEG, electroencephalogram; EN, enteral nutrition; GLIM, global leadership initiative on malnutrition; ICU, intensive care unit; M±SD, mean ± standard deviation; NRS 2002, nutrition risk screening 2002; NU-DESC, nursing delirium screening scale; ONS, oral nutrition supplements; PG-SGA, patient-generated subjective global assessment; POD, postoperative delirium; PN, parenteral nutrition; PNI, prognostic nutritional index.

Table S3 Summary of revisions during the first round of Delphi expert consultation.

| Item | | Original recommendations | Expert opinions | Revisions |
| --- | --- | --- | --- | --- |
| 2 | Nutritional risk screening is conducted using NRS 2002. Patients at risk should receive further comprehensive nutritional assessment using PG-SGA/GLIM. | | It is best to specify an evaluation period. | The original entry has been changed to: Nutritional risk screening using NRS 2002 should be conducted within 24 hours. For patients at a risk of malnutrition, a comprehensive nutritional assessment using PG-SGA/GLIM should be conducted within 48 hours. |
| 3 | For patients at nutritional risk, basic nutritional assessments are required, including nutrition-related medical history, dietary surveys, physical examinations, laboratory tests, body composition analysis, physical fitness tests, and comprehensive nutritional assessment scales, which can serve as baseline indicators for developing treatment plans, prescribing nutritional prescriptions, and implementing monitoring. | | There is a lack of indicators for monitoring the effectiveness of nutritional therapy. | Monitor serum albumin and lymphocyte count weekly. |
| 4 | If any of the following conditions are met (weight loss >10%-15% within 6 months; body mass index <18.5; PG-SGA grade C or NRS 2002 score >5; serum albumin <30g/L) in the absence of renal dysfunction, surgery should be postponed for 7-14 days for preoperative nutritional therapy. | | It is difficult to implement in actual clinical practice. | In clinical practice, the specific circumstances of the patient and the surgery should be taken into account. |
| 9 | Actively treat pre-existing nutritional and metabolic disorders, such as anemia, folic acid, vitamin B1, B12 deficiency, hypoglycemia, dehydration, electrolyte imbalance, and acidosis, as these are all triggering factors for delirium. | | There is a lack of standardized preoperative delirium risk assessment tools. No prevention strategies to differentiate between different types of delirium (hyperactive/inhibitory). Unclear criteria for identifying high-risk patients. | Based on the patient's basic information (age, sex), medical history (cancer type, stage, history of neurological diseases), nutritional status (NRS 2002 score, serum albumin level), cognitive function (Mini Mental State Examination score), comorbidities (hypertension and diabetes), and medication use (anticholinergics or opioids) to assess the risk of POD. |

| 13 and 14 | Oral feeding should be resumed in the early postoperative period (<24 hours). If oral feeding is not possible or oral intake is less than 50% of nutritional requirements, enteral nutrition should be started early. Start at a low rate (10-20 ml/h) and small dose, gradually increasing the dose according to the patient's tolerance, generally adjusting to the target intake in 5-7 days. If the energy and protein intake from enteral nutrition is less than 50% of the target intake for more than 7 days, parenteral nutrition should be used in conjunction. | Not all surgeries allow patients to eat within 24 hours after the procedure. | Remove (<24h). |
| --- | --- | --- | --- |
| 17 | Provide comfort care and reorientation through cognitive stimulation, such as talking to the patient about people, things, and events they are familiar with, to help them regain their orientation. | The specific operational details of cognitive stimulation are not detailed enough. | Three "3 Questions" training sessions daily (time/location/person). |
| 23, 24, and 25 | Establish a nutrition support team (physician, nurse, nutritionist) and a delirium management team to develop individualized plans. | The team's roles and responsibilities are not clearly defined. There is a lack of standardized communication mechanisms; and the timing of intervention measures is vague. | Preoperative nutritional screening should be completed within 24 hours of patient admission. For patients at nutritional risks, a comprehensive nutritional assessment and treatment plan should be developed within 48 hours. Anesthesia risk assessment and medication adjustments should be completed before anesthesia induction. Patient consciousness is assessed within 2 hours postoperatively. Early nutritional support is initiated within 6 hours (for eligible patients). An electronic system is used to set reminders for key interventions. The monitoring team regularly checks the implementation time of interventions, promptly identifying and addressing any delays to ensure timely implementation. |

GLIM, global leadership initiative on malnutrition; NRS 2002, nutrition risk screening 2002; PG-SGA, patient-generated subjective global assessment; POD, postoperative delirium.

Table S4. Summary of revisions during the second round of Delphi expert consultation.

| Item | | Original plan content | Expert opinions | Revisions |
| --- | --- | --- | --- | --- |
| 6 | Patients without gastrointestinal motility disorders are advised to fast from solid foods for 6 hours before surgery and from clear liquids for 2 hours before surgery. If the patient has no history of diabetes, it is recommended to drink 400 mL of a beverage containing 12.5% ​​carbohydrates 2 hours before surgery, which can alleviate hunger, thirst, and anxiety, and reduce the incidence of postoperative insulin resistance and hyperglycemia. | | In clinical practice, the individual circumstances of patients must be taken into account. | For patients without gastrointestinal motility disorders, it is recommended to fast from solid food for 6 hours before surgery and from clear liquids for 2 hours before surgery. If there is no history of diabetes, it is recommended to drink 400 mL of a beverage containing 12.5% ​​carbohydrates 2 hours before surgery to alleviate discomfort and reduce postoperative risks. In clinical practice, adjustments should be made flexibly based on individual differences such as patient age, underlying diseases, and nutritional status. |
| 23 | Establish a nutrition support team (physician, nurse, nutritionist) and a delirium management team to develop individualized plans. | | The team collaboration process is unclear, and the responsibilities of each role are not defined. | Physicians develop surgical and treatment plans, nutritionists assess nutritional status, nurses implement screening and daily monitoring, anesthesiologists manage intraoperative procedures, and rehabilitation specialists provide early mobilization guidance. Increase the frequency of regular multidisciplinary meetings (e.g., weekly case discussion). |
